# Supplementary material
Source: publisher figshare collection journal article supplement (https://asha.figshare.com/articles/dataset/_/12640409)
Supplement: Supplementary file 1 [file 1]

## Supplemental Material S5.

### *Instruction Time Reported by Voice Instructors in 2015 and 2018*

|                                                                                                                                                                         | <i>Voice Instructors</i> |          |             |          |
|-------------------------------------------------------------------------------------------------------------------------------------------------------------------------|--------------------------|----------|-------------|----------|
|                                                                                                                                                                         | <i>2015</i>              |          | <i>2018</i> |          |
|                                                                                                                                                                         | <i>N</i>                 | <i>%</i> | <i>N</i>    | <i>%</i> |
| <i>Do you currently include the topic of transgender voice in the voice course?</i>                                                                                     |                          |          |             |          |
| Yes                                                                                                                                                                     | 20                       | 83       | 14          | 93       |
| No                                                                                                                                                                      | 4                        | 17       | 1           | 7        |
| <i>Do you feel the time you spend on the topic is sufficient for students to have the knowledge and skills to serve individuals seeking transgender voice services?</i> |                          |          |             |          |
| Yes                                                                                                                                                                     | 14                       | 70       | 4           | 29       |
| No                                                                                                                                                                      | 6                        | 30       | 10          | 71       |
| <i>If you do not address transgender voice and communication services in your course, why?</i><br>(responders can choose more than 1 answer)                            |                          |          |             |          |
| Addressed in other courses                                                                                                                                              | 0                        | 0        | 0           | 0        |
| Not enough course time                                                                                                                                                  | 2                        | 40       | 1           | 100      |
| Sufficient continuing education                                                                                                                                         | 0                        | 0        | 0           | 0        |
| Population too narrow                                                                                                                                                   | 1                        | 20       | 0           | 0        |
| Uncomfortable teaching topic                                                                                                                                            | 0                        | 0        | 0           | 0        |
| Prefer not to answer                                                                                                                                                    | 2                        | 40       | 0           | 0        |
