# Supplementary material
Source: publisher figshare collection journal article supplement (https://asha.figshare.com/articles/dataset/_/12640409)
Supplement: Supplementary file 2 [file 1]

---

**Supplemental Material S2.**

*Education and Experience of Clinic Directors in Transgender Voice Services in 2015*

---

|                                                                                                            | <i>Clinic Directors</i> |    |
|------------------------------------------------------------------------------------------------------------|-------------------------|----|
|                                                                                                            | 2015                    |    |
|                                                                                                            | N                       | %  |
| <hr/>                                                                                                      |                         |    |
| <i>Was transgender voice and communication addressed in your SLP graduate level curriculum?</i>            |                         |    |
| Yes                                                                                                        | 2                       | 15 |
| No                                                                                                         | 11                      | 85 |
| <i>Have you ever participated in a continuing education course on transgender voice and communication?</i> |                         |    |
| Yes                                                                                                        | 6                       | 46 |
| No                                                                                                         | 7                       | 54 |
| <i>Have you ever assessed a client seeking transgender voice and communication services?</i>               |                         |    |
| Yes                                                                                                        | 6                       | 46 |
| No                                                                                                         | 7                       | 54 |
| <i>Have you ever treated a client seeking transgender voice and communication services?</i>                |                         |    |
| Yes                                                                                                        | 6                       | 46 |
| No                                                                                                         | 7                       | 54 |

---
