# Supplementary material
Source: publisher figshare collection journal article supplement (https://asha.figshare.com/articles/dataset/_/12640409)
Supplement: Supplementary file 3 [file 1]

# **Supplemental Material S1.**

## *Education and Experience of Voice Instructors in Transgender Voice Services in 2015 and 2018*

|                                                                                                            | <b>Voice Instructors</b> |    |             |    |
|------------------------------------------------------------------------------------------------------------|--------------------------|----|-------------|----|
|                                                                                                            | <i>2015</i>              |    | <i>2018</i> |    |
|                                                                                                            | N                        | %  | N           | %  |
| <i>Was transgender voice and communication addressed in your SLP graduate level curriculum?</i>            |                          |    |             |    |
| Yes                                                                                                        | 5                        | 21 | 4           | 27 |
| No                                                                                                         | 19                       | 79 | 11          | 73 |
| <i>Have you ever participated in a continuing education course on transgender voice and communication?</i> |                          |    |             |    |
| Yes                                                                                                        | 13                       | 54 | 13          | 87 |
| No                                                                                                         | 11                       | 46 | 2           | 13 |
| <i>Have you ever assessed a client seeking transgender voice and communication services?</i>               |                          |    |             |    |
| Yes                                                                                                        | 16                       | 67 | 12          | 80 |
| No                                                                                                         | 8                        | 33 | 3           | 20 |
| <i>Have you ever treated a client seeking transgender voice and communication services?</i>                |                          |    |             |    |
| Yes                                                                                                        | 16                       | 67 | 9           | 60 |
| No                                                                                                         | 8                        | 33 | 6           | 40 |
