# Supplementary material
Source: publisher figshare collection journal article supplement (https://asha.figshare.com/articles/dataset/_/12640409)
Supplement: Supplementary file 4 [file 1]

---

**Supplemental Material S3.**

*Attitudes of Voice Instructors in 2015 and 2018*

---

|                                                                                                                     | <i>Voice Instructors</i> |          |             |          |
|---------------------------------------------------------------------------------------------------------------------|--------------------------|----------|-------------|----------|
|                                                                                                                     | <i>2015</i>              |          | <i>2018</i> |          |
|                                                                                                                     | <i>N</i>                 | <i>%</i> | <i>N</i>    | <i>%</i> |
| <i>Do you believe transgender voice and communication services should be part of the scope of practice of SLPs?</i> |                          |          |             |          |
| Yes                                                                                                                 | 24                       | 100      | 15          | 100      |
| No                                                                                                                  | 0                        | 0        | 0           | 0        |
| <i>Do you believe transgender voice services should be included in SLP graduate level voice courses?</i>            |                          |          |             |          |
| Yes                                                                                                                 | 24                       | 100      | 15          | 100      |
| No                                                                                                                  | 0                        | 0        | 0           | 0        |
| <i>Do you feel comfortable providing services for an individual who is transgender?</i>                             |                          |          |             |          |
| Yes                                                                                                                 | 22                       | 92       | 15          | 100      |
| No                                                                                                                  | 2                        | 8        | 0           | 0        |
| <i>Do you feel confident providing services for an individual who is transgender?</i>                               |                          |          |             |          |
| Yes                                                                                                                 | 19                       | 79       | 13          | 87       |
| No                                                                                                                  | 5                        | 21       | 2           | 13       |

---
