# Supplementary material
Source: publisher figshare collection journal article supplement (https://asha.figshare.com/articles/dataset/_/12640409)
Supplement: Supplementary file 5 [file 1]

---

**Supplemental Material S4.**

*Attitudes of Clinic Directors in 2015*

---

|                                                                                                                                                 | <i>Clinic Directors</i> |     |
|-------------------------------------------------------------------------------------------------------------------------------------------------|-------------------------|-----|
|                                                                                                                                                 | <i>2015</i>             |     |
|                                                                                                                                                 | N                       | %   |
| <i>Do you believe transgender voice and communication services should be part of the scope of practice of SLPs?</i>                             |                         |     |
| Yes                                                                                                                                             | 13                      | 100 |
| No                                                                                                                                              | 0                       | 0   |
| <i>I feel my students are knowledgeable about the SLP's role in the assessment and treatment of voice for an individual who is transgender.</i> |                         |     |
| Strongly Agree                                                                                                                                  | 0                       | 0   |
| Agree                                                                                                                                           | 9                       | 69  |
| Disagree                                                                                                                                        | 3                       | 23  |
| Strongly Disagree                                                                                                                               | 1                       | 8   |
| <i>I think sufficient instruction time is spent on transgender voice and communication services in my graduate SLP program.</i>                 |                         |     |
| Strongly Agree                                                                                                                                  | 0                       | 0   |
| Agree                                                                                                                                           | 6                       | 46  |
| Disagree                                                                                                                                        | 5                       | 38  |
| Strongly Disagree                                                                                                                               | 2                       | 15  |
| <i>Do you feel comfortable providing services for an individual who is transgender?</i>                                                         |                         |     |
| Yes                                                                                                                                             | 12                      | 92  |
| No                                                                                                                                              | 1                       | 8   |
| <i>Do you feel confident providing services for an individual who is transgender?</i>                                                           |                         |     |
| Yes                                                                                                                                             | 7                       | 54  |
| No                                                                                                                                              | 6                       | 46  |

Supplemental material, Jakomin et al., "Opportunities to Learn Transgender Voice and Communication Therapy in Graduate Speech-Language Pathology Education: Preliminary E-Survey Findings," *Perspectives of the ASHA Special Interest Groups*,  
[https://doi.org/10.1044/2020\\_PERSP-20-00047](https://doi.org/10.1044/2020_PERSP-20-00047)

*Do you think transgender voice and communication should be billed for insurance?*

|     |    |    |
|-----|----|----|
| Yes | 10 | 77 |
| No  | 3  | 23 |

*Transgender voice therapy is a:*

|            |    |    |
|------------|----|----|
| Difference | 11 | 85 |
| Disorder   | 2  | 15 |

---
