# Supplementary material
Source: publisher figshare collection journal article supplement (https://asha.figshare.com/articles/dataset/_/12640409)
Supplement: Supplementary file 6 [file 1]

# **Supplemental Material S6.**

## *Instruction Time Reported by Clinic Directors in 2015*

|                                                                                         | <i>Clinic Directors</i> |    |
|-----------------------------------------------------------------------------------------|-------------------------|----|
|                                                                                         | N                       | %  |
| <i>Does your college or university currently serve individuals who are transgender?</i> |                         |    |
| Yes                                                                                     | 9                       | 69 |
| No                                                                                      | 2                       | 15 |
| Unsure                                                                                  | 2                       | 15 |
| <i>How common is it to have transgender clients at the university level?</i>            |                         |    |
| Very Common                                                                             | 1                       | 8  |
| Common                                                                                  | 0                       | 0  |
| Uncommon                                                                                | 11                      | 85 |
| No answer                                                                               | 1                       | 8  |
| <i>In the last year, how many transgender clients has your university served?</i>       |                         |    |
| 0                                                                                       | 6                       | 46 |
| 1–5                                                                                     | 4                       | 31 |
| 6–10                                                                                    | 2                       | 15 |
| 11–20                                                                                   | 0                       | 0  |
| 21+                                                                                     | 1                       | 8  |

Supplemental material, Jakomin et al., "Opportunities to Learn Transgender Voice and Communication Therapy in Graduate Speech-Language Pathology Education: Preliminary E-Survey Findings," *Perspectives of the ASHA Special Interest Groups*, [https://doi.org/10.1044/2020\\_PERSP-20-00047](https://doi.org/10.1044/2020_PERSP-20-00047)

---

*In the last 5 years, how many transgender clients has your university served?*

|       |   |    |
|-------|---|----|
| 0     | 3 | 23 |
| 1–5   | 6 | 46 |
| 6–10  | 0 | 0  |
| 11–20 | 3 | 23 |
| 21+   | 1 | 8  |

*Does your university do recruiting for the population?*

|     |   |    |
|-----|---|----|
| Yes | 4 | 31 |
| No  | 9 | 69 |

---
